# Supplementary material for: Evolutionary study of the isoflavonoid pathway based on multiple copies analysis in soybean
Source: PubMed Central journal article supplement (PMC4076065; doi:10.1186/1471-2156-15-76), 2014-06-24

**c CHS**

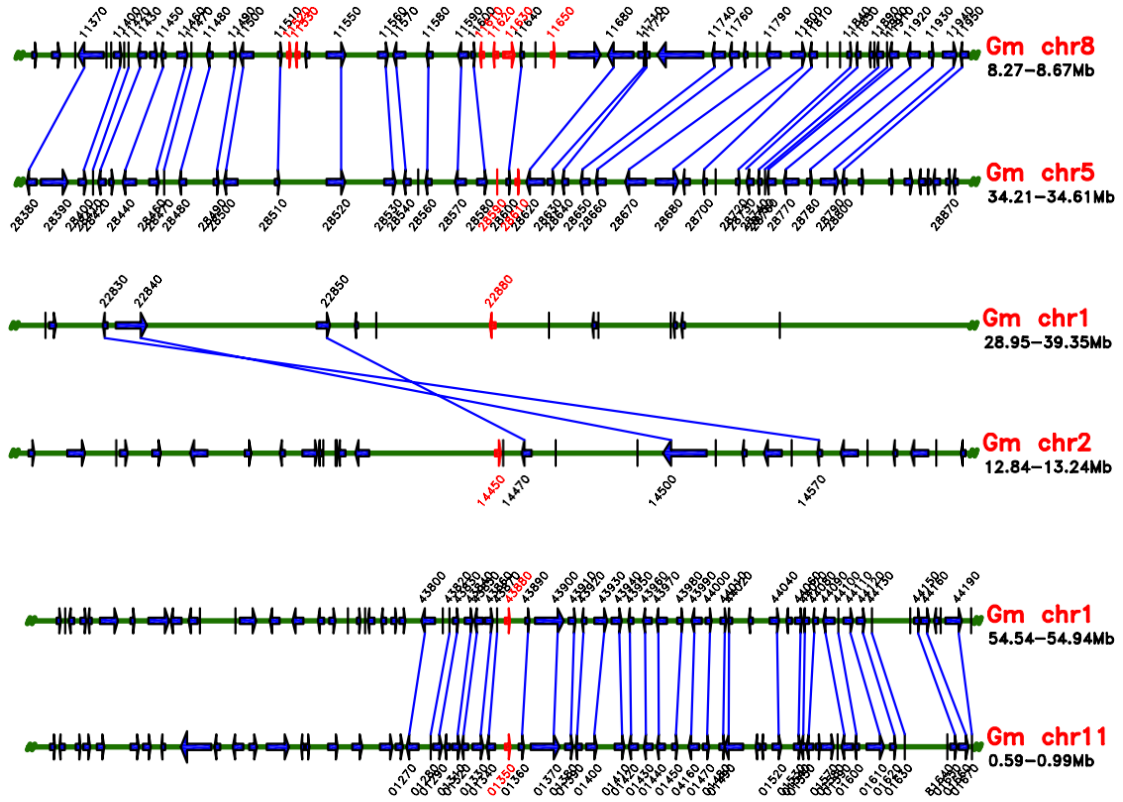

**d CHR**

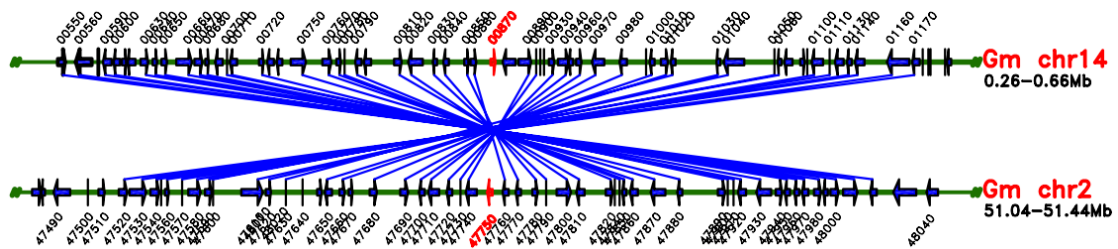

**e CHI**

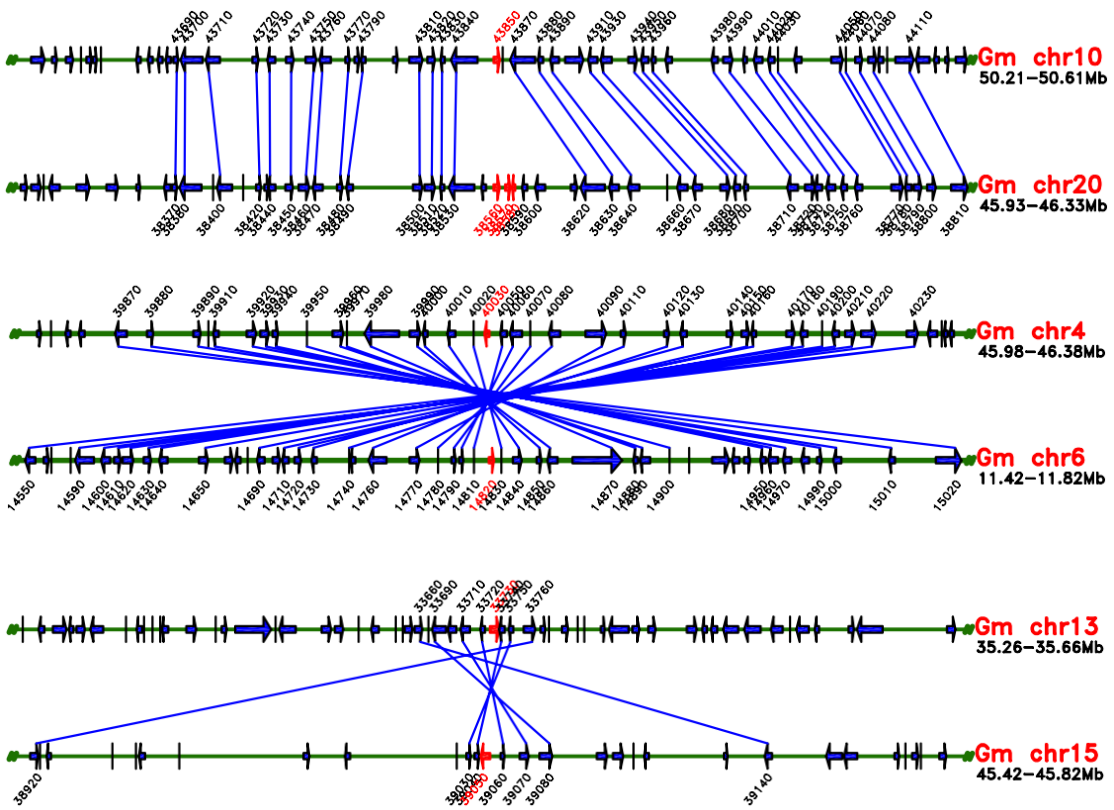

**f IFS**

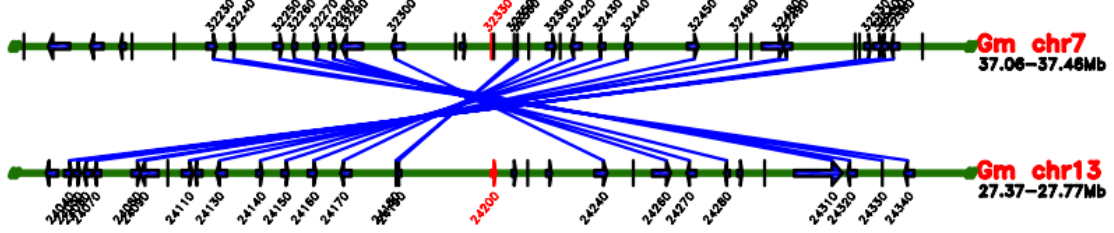

### g IOMT

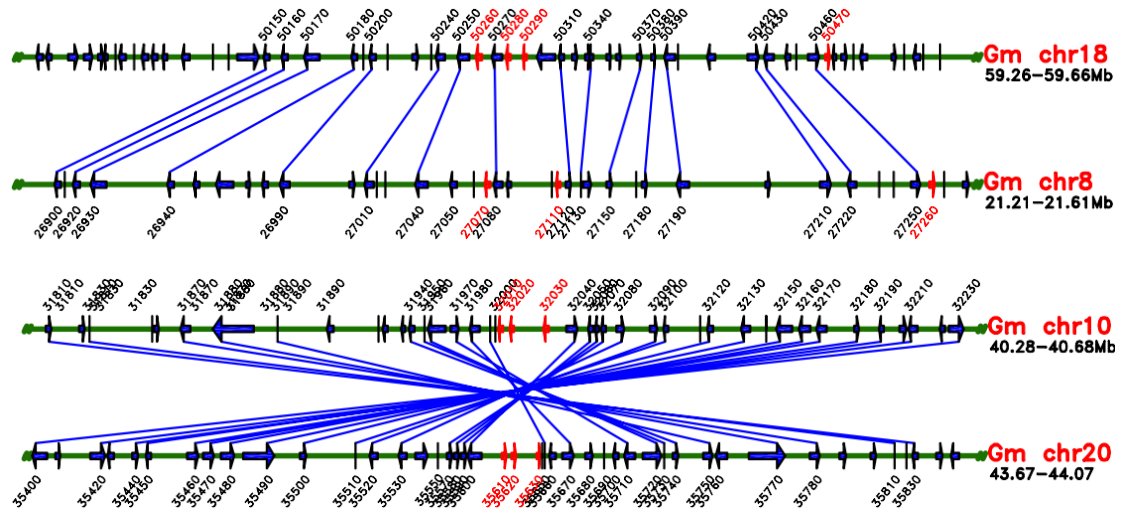

### h IFR

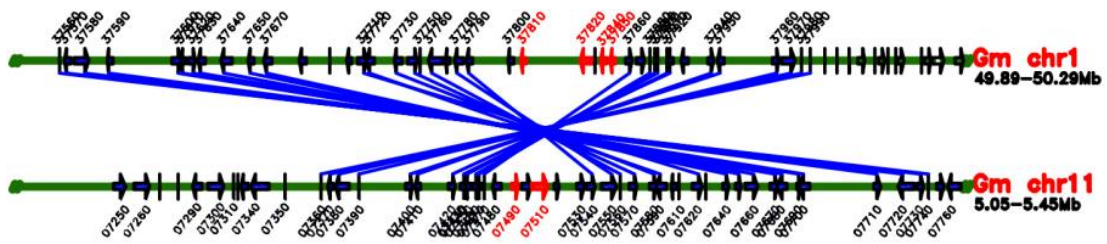

Supplement: 1471-2156-15-76-S2.pdf [file 1471-2156-15-76-S2.pdf]
